# Supplementary material for: Proteome and transcriptome profile analysis reveals regulatory and stress-responsive networks in the russet fruit skin of sand pear
Source: PubMed Central journal article supplement (PMC6994700; doi:10.1038/s41438-020-0242-3), 2020-02-01
Supplement: 41438_2020_242_MOESM2_ESM.pdf [file 41438_2020_242_MOESM2_ESM.pdf]

Yuezhi Wang\*, Meisong Dai, Danying Cai, Zebin Shi\*

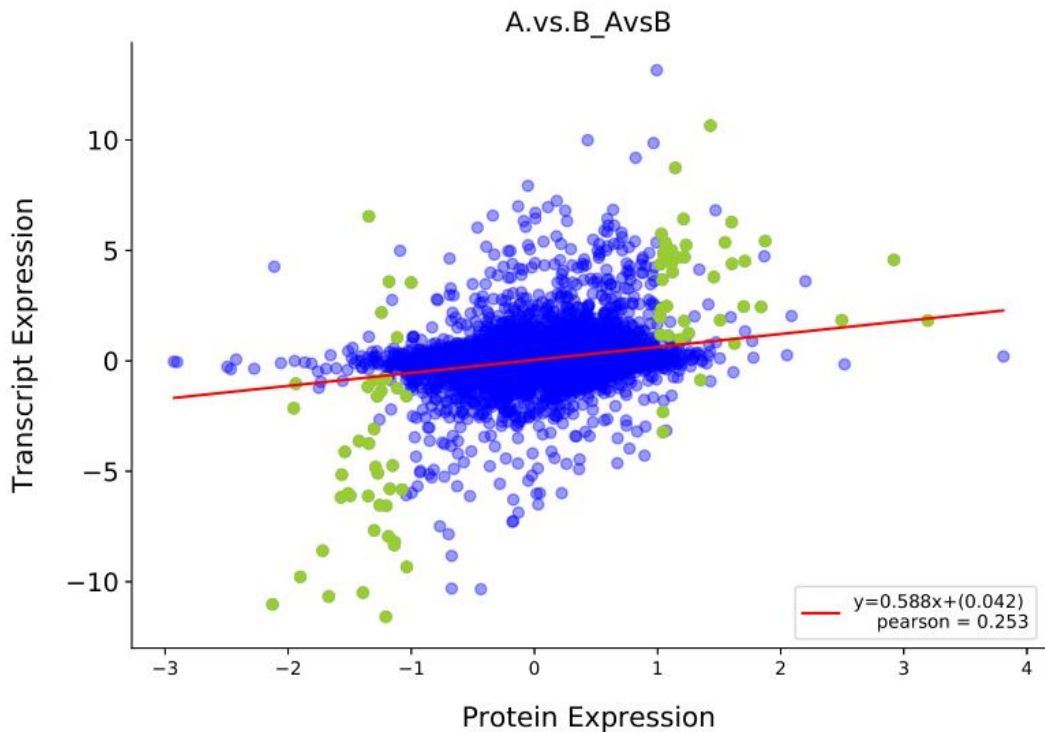

**Supplementary Fig. S2** Concordant tests revealed a relative low correlation between 10,881 pairs of proteins and cognate mRNAs.
